# Supplementary material for: Rbfox1 Downregulation and Altered Calpain 3 Splicing by FRG1 in a Mouse Model of Facioscapulohumeral Muscular Dystrophy (FSHD)
Source: PubMed Central journal article supplement (PMC3536703; doi:10.1371/journal.pgen.1003186), 2013-01-03
Supplement: pgen.1003186.s012.pdf [file pgen.1003186.s012.pdf]

| <b>GENE SYMBOL</b> | <b>GENE NAME</b>                                     |
|--------------------|------------------------------------------------------|
| <b>Thyn1</b>       | Thymocyte nuclear protein 1                          |
| <b>Sepx1</b>       | Selenoprotein X, 1                                   |
| <b>Fastkd3</b>     | FAST kinase domains 3                                |
| <b>Atl2</b>        | Atlastin GTPase 2                                    |
| <b>Clk1</b>        | CDC-like kinase 1                                    |
| <b>Nrap</b>        | Nebulin-related anchoring protein                    |
| <b>Itga3</b>       | Integrin, alpha 3                                    |
| <b>Mdm4</b>        | Mdm4 p53 binding protein                             |
| <b>Ndrp2</b>       | N-myc downstream regulator 2                         |
| <b>Ttn</b>         | M-Titin                                              |
| <b>Ablim1</b>      | actin binding LIM protein 1                          |
| <b>Itga7</b>       | Integrin, alpha 7                                    |
| <b>Capn3</b>       | Calpain 3                                            |
| <b>Camk2a</b>      | Calcium/calmodulin-dependent protein kinase II alpha |
| <b>Taz</b>         | Tafazzin                                             |
| <b>Phc3</b>        | Polyhomeotic homolog 3                               |
| <b>Ddx39</b>       | DEAD (Asp-Glu-Ala-Asp) box polypeptide 39            |
| <b>Nasp</b>        | Nuclear autoantigenic sperm protein                  |
| <b>Midn</b>        | Midnolin                                             |
| <b>Pcm1</b>        | Pericentriolar material 1                            |
| <b>Mapk12</b>      | Mitogen-activated protein kinase 12                  |
| <b>Kank1</b>       | KN motif and ankyrin repeat domains 1                |
| <b>Ccn1</b>        | Cyclin L1                                            |
| <b>Carm1</b>       | Coactivator-associated arginine methyltransferase 1  |
| <b>Camk2b</b>      | Calcium/calmodulin-dependent protein kinase II beta  |
| <b>Clk4</b>        | CDC-like kinase 4                                    |
| <b>Atxn2</b>       | Ataxin 2                                             |
| <b>Pum1</b>        | Pumilio homolog 1                                    |
| <b>Jmjd1a</b>      | Jumonji domain containing 1A                         |
| <b>Dph3</b>        | KTI11 homolog                                        |
| <b>Bre</b>         | Brain and reproductive organ-expressed               |
| <b>Tlk1</b>        | Tousled-like kinase 1                                |
| <b>Huwe1</b>       | HECT, UBA and WWE domain containing 1                |
| <b>Ktn1</b>        | Kinectin 1                                           |
| <b>Dysf</b>        | Dysferlin                                            |
| <b>Neo1</b>        | Neogenin homolog 1                                   |
| <b>Capn7</b>       | Calpain7                                             |
| <b>Palld</b>       | Palladin                                             |
| <b>Ckdn1b</b>      | Cyclin-dependent kinase inhibitor 1B                 |
| <b>Kif2a</b>       | Kinesin heavy chain member 2A                        |
| <b>Cul2</b>        | Cullin 2                                             |
| <b>Eya1</b>        | Eyes absent homolog 1                                |
| <b>Dym</b>         | Dymeclin                                             |
| <b>Prmt5</b>       | Protein arginine methyltransferase 5                 |
| <b>Ank1</b>        | Ankyrin 1                                            |
| <b>Myf6</b>        | Myosin, light chain 6                                |
| <b>Brd2</b>        | Bromodomain containing 2                             |
| <b>Ncor1</b>       | Nuclear receptor co-repressor 1                      |
